# Supplementary material
Source: publisher figshare collection journal article supplement (https://future-science-group.figshare.com/ndownloader/files/27893520)
Supplement: Supplementary file 1 [file 27893520]

**Table S2:** *KEGG pathways associated with genes annotated to the 79 sites identified in ANDIS*

| Gene set | Description | Size of gene set | Overlap with identified genes | P-value | FDR | Genes | Annotated methylation sites |
| --- | --- | --- | --- | --- | --- | --- | --- |
| hsa00330 | Arginine and proline metabolism | 50 | 2 | 0.009 | 1 | *ALDH2;CKMT2* | cg05212570; cg11608521; cg11608521; cg11608521 |
| hsa00330 | Thiamine metabolism | 16 | 1 | 0.046 | 1 | *THTPA* | cg04056959; cg04056959 |

2 KEGG pathways with p<0.05 associated with the 72 unique genes annotated to the 79 significant sites found in the ANDIS discovery cohort. KEGG gene set analyses were conducted using WebGestaltR [5].
